# Supplementary material for: In Vitro and Ex Vivo Evaluation of Mangifera indica L. Extract-Loaded Green Nanoparticles in Topical Emulsion against Oxidative Stress and Aging
Source: MDPI journal article supplement (doi:10.3390/biomedicines10092266), 2022-09-13
Supplement: s1 [file s1]

# Supporting Information

80(0.5) 20/m-125(0.5) 3/m-260 (2)Inj255 aux270

, 15-Jun-2021 + 14:55:55

zahir800 457 (7.565)

2.00e6

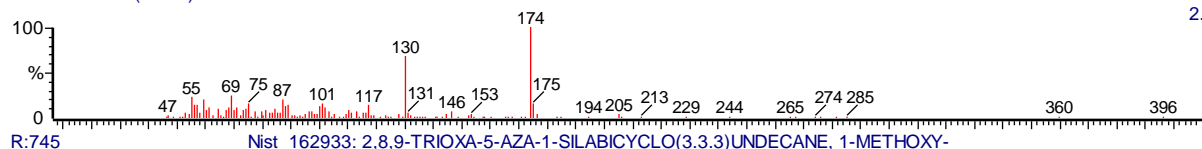

R:745

Nist 162933: 2,8,9-TRIOXA-5-AZA-1-SILABICYCLO(3.3.3)UNDECANE, 1-METHOXY-

Hit 1

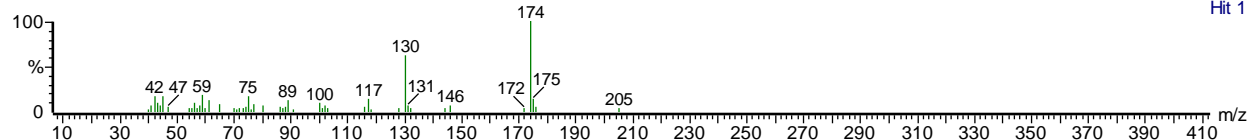

| Hit | Rev | For | Compound Name                            | M.W. | Formula    | CAS       | Library |
|-----|-----|-----|------------------------------------------|------|------------|-----------|---------|
| 1   | 745 | 543 | 2,8,9-TRIOXA-5-AZA-1-SILABICYCLO(3.3.3)U | 205  | C7H15O4NSi | 4025-80-3 | Nist    |

80(0.5) 20/m-125(0.5) 3/m-260 (2)Inj255 aux270

, 15-Jun-2021 + 14:55:55

zahir800 967 (11.337)

9.67e5

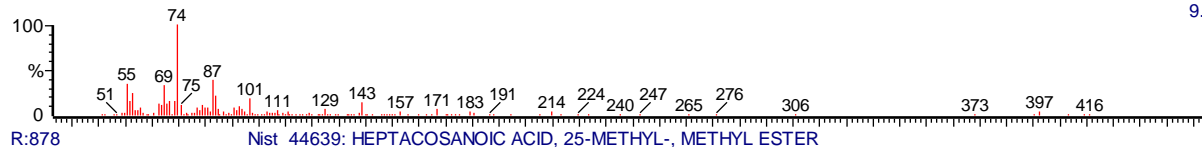

R:878

Nist 44639: HEPTACOSANOIC ACID, 25-METHYL-, METHYL ESTER

Hit 1

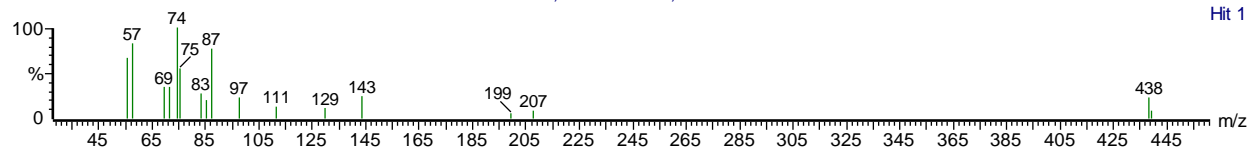

| Hit | Rev         | For | Compound Name                            | M.W. | Formula  | CAS         | Library |
|-----|-------------|-----|------------------------------------------|------|----------|-------------|---------|
| 1   | 878<br>Nist | 561 | HEPTACOSANOIC ACID, 25-METHYL-, METHYL E | 438  | C29H58O2 | 900112-14-5 |         |

80(0.5) 20/m-125(0.5) 3/m-260 (2)Inj255 aux270

, 15-Jun-2021 + 14:55:55

zahir800 1151 (12.257)

7.35e5

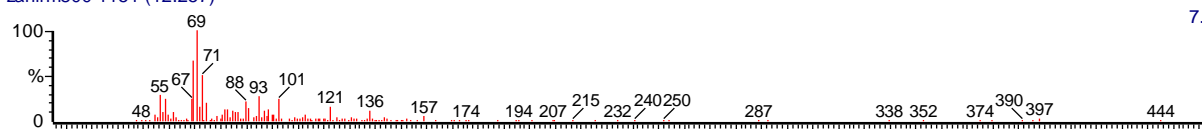

R:753 Nist 35251: SUCCINIC ACID, CYCLOHEXYLMETHYL GERANYL ESTER

Hit 1

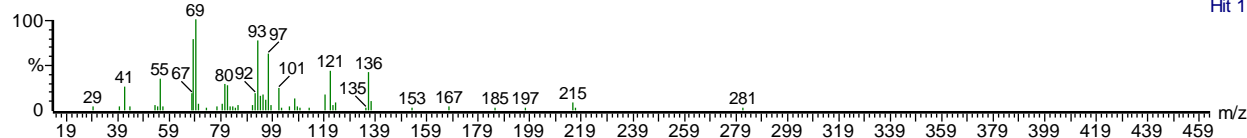

| Hit | Rev         | For | Compound Name                           | M.W. | Formula  | CAS         | Library |
|-----|-------------|-----|-----------------------------------------|------|----------|-------------|---------|
| 1   | 753<br>Nist | 517 | SUCCINIC ACID, CYCLOHEXYLMETHYL GERANYL | 350  | C21H34O4 | 900391-21-5 |         |

80(0.5) 20/m-125(0.5) 3/m-260 (2)Inj255 aux270

, 15-Jun-2021 + 14:55:55

zahir800 1265 (12.828)

5.92e5

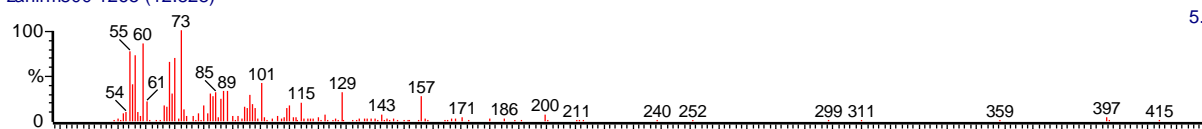

R:819 Nist 252100: DODECANOIC ACID

Hit 1

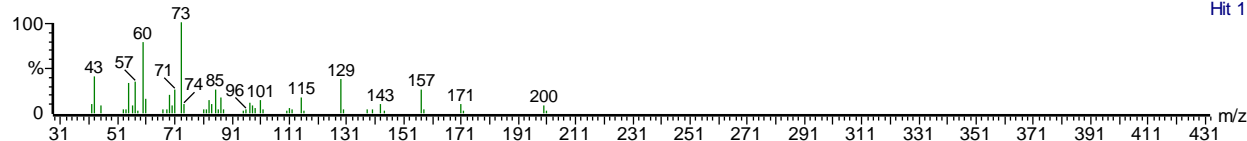

| Hit | Rev | For | Compound Name   | M.W. | Formula  | CAS      | Library |
|-----|-----|-----|-----------------|------|----------|----------|---------|
| 1   | 819 | 704 | DODECANOIC ACID | 200  | C12H24O2 | 143-07-7 | Nist    |

80(0.5) 20/m-125(0.5) 3/m-260 (2)Inj255 aux270

, 15-Jun-2021 + 14:55:55

zahir800 1474 (13.873)

3.10e5

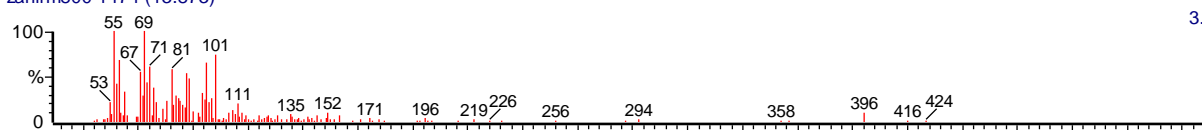

R:803 Nist 35119: 2,6,10,14-TETRAMETHYL-7-(3-METHYLPENT-4-ENYLIDENE) PENTADECANE

Hit 1

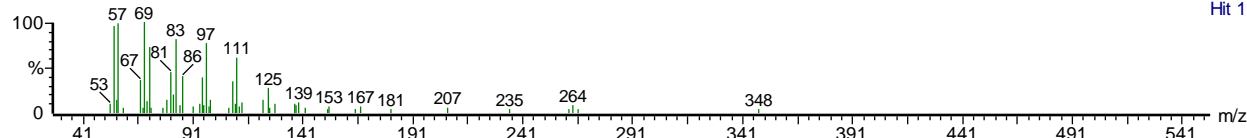

| Hit | Rev | For | Compound Name                            | M.W. | Formula | CAS         | Library |
|-----|-----|-----|------------------------------------------|------|---------|-------------|---------|
| 1   | 803 | 533 | 2,6,10,14-TETRAMETHYL-7-(3-METHYLPENT-4- | 348  | C25H48  | 900370-41-6 | Nist    |

80(0.5) 20/m-125(0.5) 3/m-260 (2)Inj255 aux270

, 15-Jun-2021 + 14:55:55

zahirm800 2250 (17.755)

3.30e6

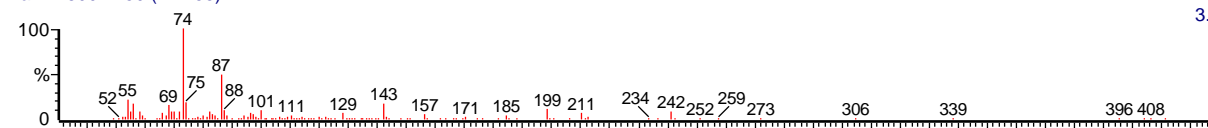

R:943 Nist 252934: TRIDECANOIC ACID, 12-METHYL-, METHYL ESTER

Hit 1

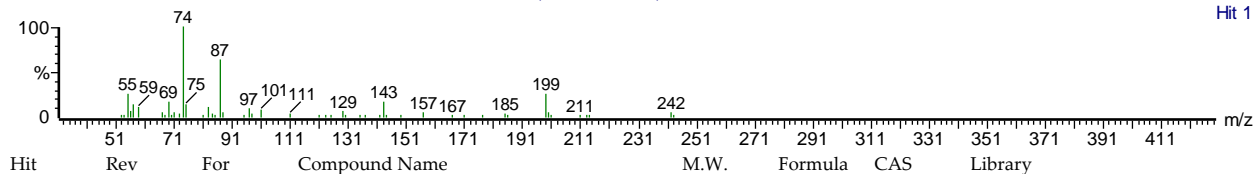

| Hit | Rev | For | Compound Name                            | M.W. | Formula  | CAS       | Library |
|-----|-----|-----|------------------------------------------|------|----------|-----------|---------|
| 1   | 943 | 882 | TRIDECANOIC ACID, 12-METHYL-, METHYL EST | 242  | C15H30O2 | 5129-58-8 | Nist    |

80(0.5) 20/m-125(0.5) 3/m-260 (2)Inj255 aux270

, 15-Jun-2021 + 14:55:55

zahirm800 2752 (20.266)

8.35e5

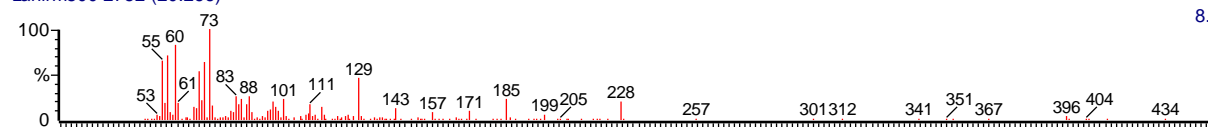

R:858 Nist 252097: TETRADECANOIC ACID

Hit 1

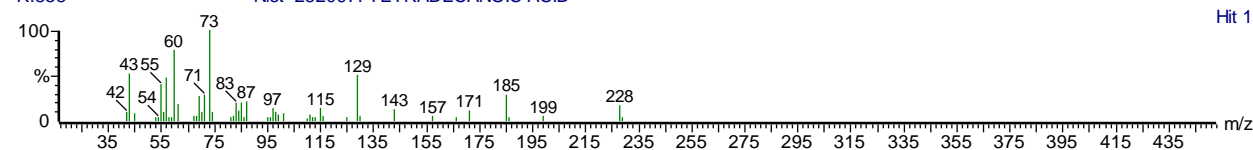

| Hit | Rev | For | Compound Name      | M.W. | Formula  | CAS      | Library |
|-----|-----|-----|--------------------|------|----------|----------|---------|
| 1   | 858 | 774 | TETRADECANOIC ACID | 228  | C14H28O2 | 544-63-8 | Nist    |

80(0.5) 20/m-125(0.5) 3/m-260 (2)Inj255 aux270

, 15-Jun-2021 + 14:55:55

zahirm800 3446 (23.737)

4.22e6

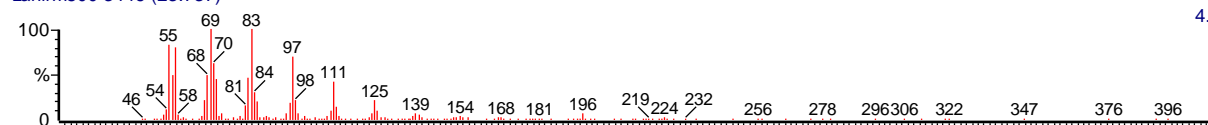

R:892 Nist 52691: CHLOROACETIC ACID, TETRADECYL ESTER

Hit 1

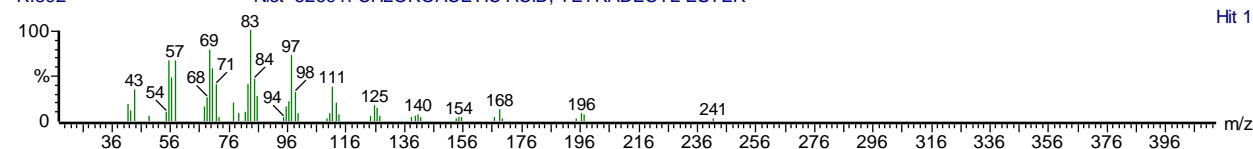

| Hit | Rev | For | Compound Name                       | M.W. | Formula    | CAS        | Library |
|-----|-----|-----|-------------------------------------|------|------------|------------|---------|
| 1   | 892 | 866 | CHLOROACETIC ACID, TETRADECYL ESTER | 290  | C16H31O2Cl | 18277-86-6 | Nist    |

80(0.5) 20/m-125(0.5) 3/m-260 (2)Inj255 aux270

, 15-Jun-2021 + 14:55:55

zahirm800 3557 (24.292)

1.40e6

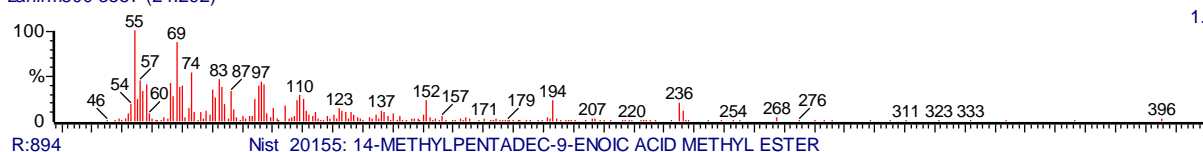

R:894 Nist 20155: 14-METHYLPENTADEC-9-ENOIC ACID METHYL ESTER

Hit 1

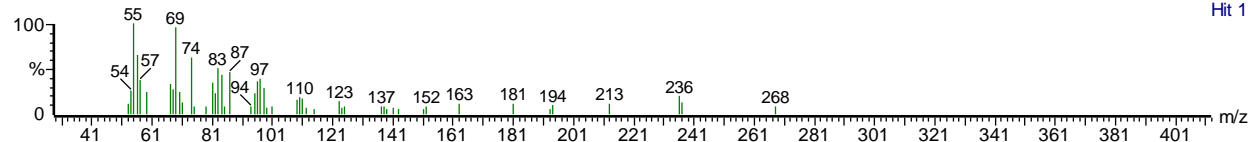

| Hit | Rev  | For | Compound Name                            | M.W. | Formula  | CAS         |
|-----|------|-----|------------------------------------------|------|----------|-------------|
| 1   | 894  | 812 | 14-METHYLPENTADEC-9-ENOIC ACID METHYL ES | 268  | C17H32O2 | 900365-89-7 |
|     | Nist |     |                                          |      |          |             |

80(0.5) 20/m-125(0.5) 3/m-260 (2)Inj255 aux270

, 15-Jun-2021 + 14:55:55

zahirm800 3770 (25.358)

1.32e7

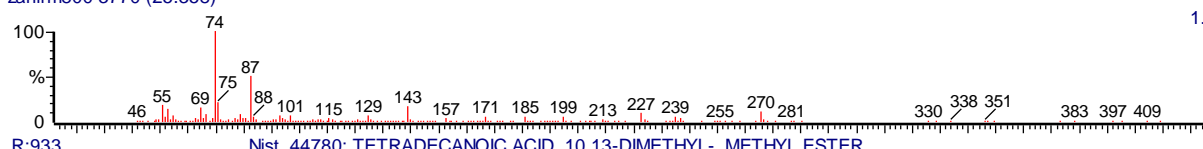

R:933 Nist 44780: TETRADECANOIC ACID, 10,13-DIMETHYL-, METHYL ESTER

Hit 1

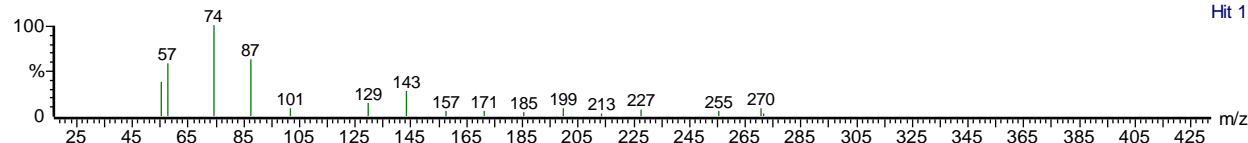

| Hit | Rev  | For | Compound Name                            | M.W. | Formula  | CAS         | Library |
|-----|------|-----|------------------------------------------|------|----------|-------------|---------|
| 1   | 933  | 661 | TETRADECANOIC ACID, 10,13-DIMETHYL-, MET | 270  | C17H34O2 | 267650-23-7 |         |
|     | Nist |     |                                          |      |          |             |         |

80(0.5) 20/m-125(0.5) 3/m-260 (2)Inj255 aux270

, 15-Jun-2021 + 14:55:55

zahirm800 4377 (28.394)

4.92e5

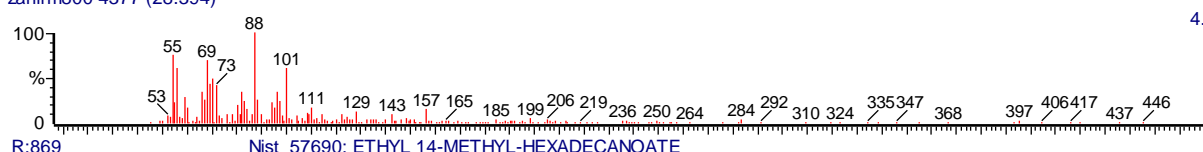

R:869 Nist 57690: ETHYL 14-METHYL-HEXADECANOATE

Hit 1

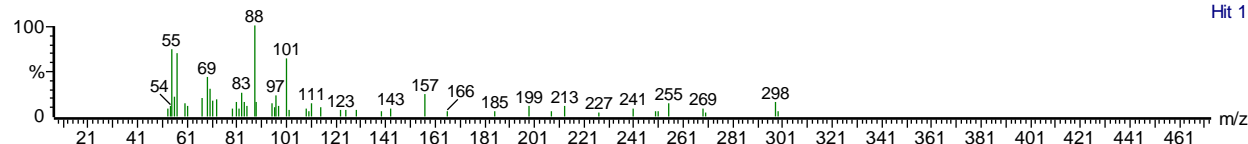

| Hit | Rev  | For | Compound Name                 | M.W. | Formula  | CAS         | Library |
|-----|------|-----|-------------------------------|------|----------|-------------|---------|
| 1   | 869  | 754 | ETHYL 14-METHYL-HEXADECANOATE | 298  | C19H38O2 | 900336-64-7 |         |
|     | Nist |     |                               |      |          |             |         |

80(0.5) 20/m-125(0.5) 3/m-260 (2)Inj255 aux270

, 15-Jun-2021 + 14:55:55

zahir800 5254 (32.781)

4.66e6

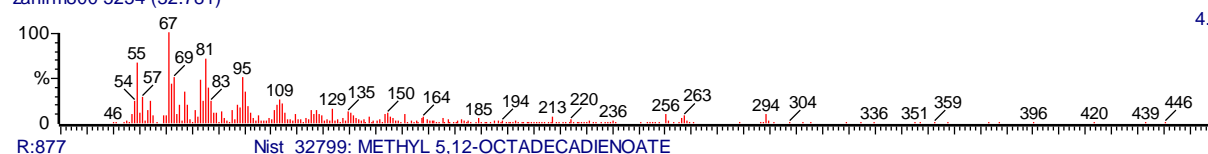

R:877 Nist 32799: METHYL 5,12-OCTADECADIENOATE

Hit 1

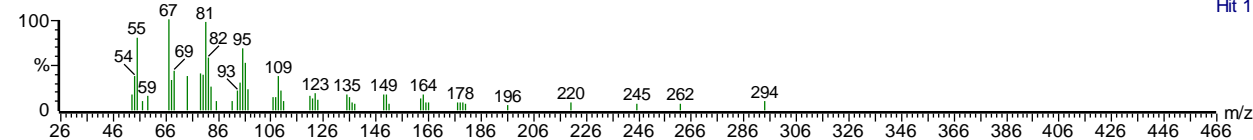

| Hit | Rev         | For | Compound Name                | M.W. | Formula | CAS | Library              |
|-----|-------------|-----|------------------------------|------|---------|-----|----------------------|
| 1   | 877<br>Nist | 735 | METHYL 5,12-OCTADECADIENOATE |      |         | 294 | C19H34O2 900336-43-1 |

80(0.5) 20/m-125(0.5) 3/m-260 (2)Inj255 aux270

, 15-Jun-2021 + 14:55:55

zahir800 5377 (33.396)

5.14e6

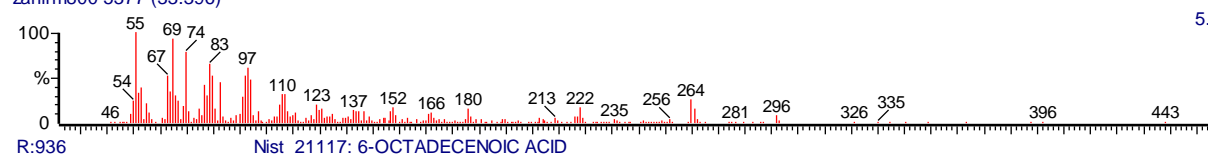

R:936 Nist 21117: 6-OCTADECENOIC ACID

Hit 1

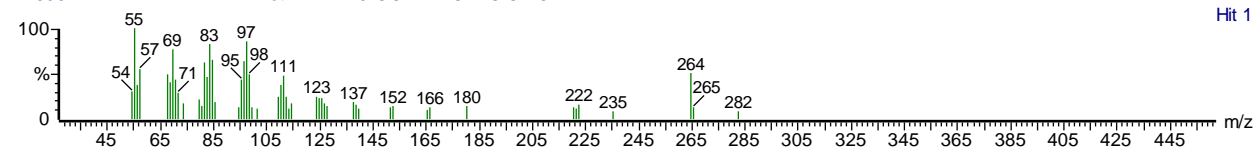

| Hit | Rev         | For | Compound Name       | M.W. | Formula | CAS | Library              |
|-----|-------------|-----|---------------------|------|---------|-----|----------------------|
| 1   | 936<br>Nist | 815 | 6-OCTADECENOIC ACID |      |         | 282 | C18H34O2 900336-66-8 |

80(0.5) 20/m-125(0.5) 3/m-260 (2)Inj255 aux270

, 15-Jun-2021 + 14:55:55

zahir800 5686 (34.942)

9.63e5

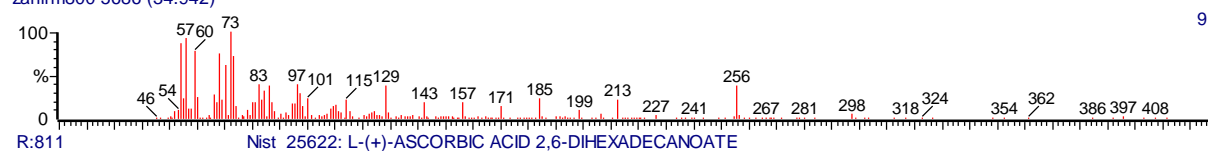

R:811 Nist 25622: L-(+)-ASCORBIC ACID 2,6-DIHEXADECANOATE

Hit 1

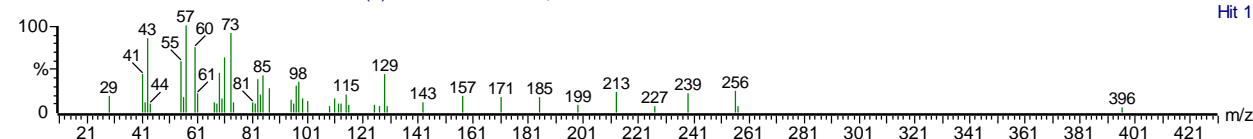

| Hit | Rev         | For | Compound Name                           | M.W. | Formula | CAS | Library             |
|-----|-------------|-----|-----------------------------------------|------|---------|-----|---------------------|
| 1   | 811<br>Nist | 683 | L-(+)-ASCORBIC ACID 2,6-DIHEXADECANOATE |      |         | 652 | C38H68O8 28474-90-0 |

Figure S1. Chromatograms of M. Indica Peels and Kernel extract

## Wrinkles

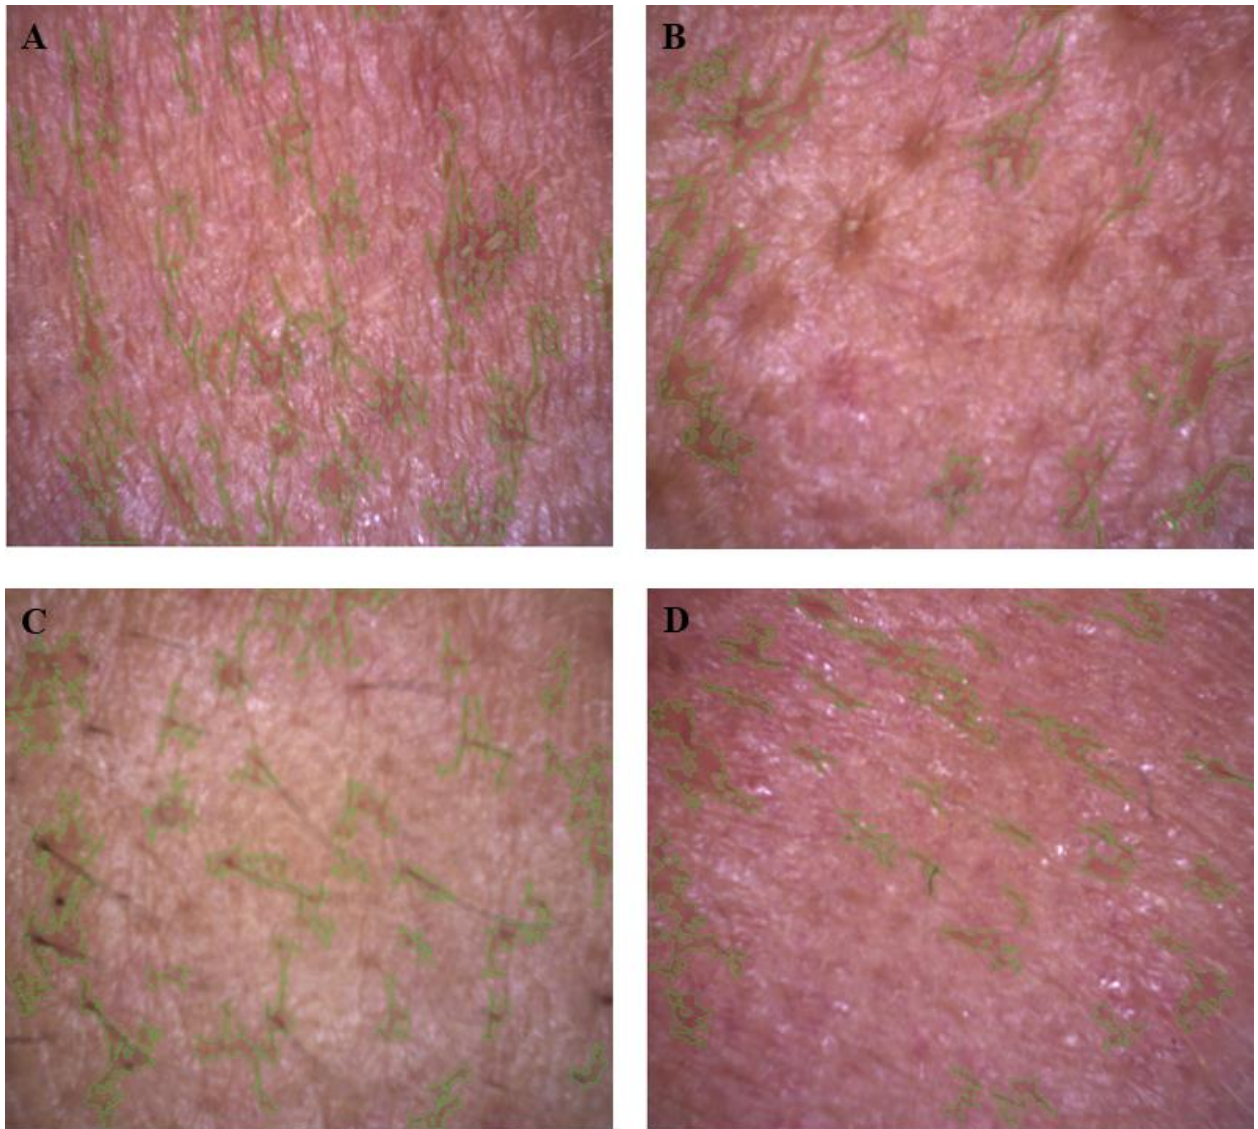

**Figure S2.** Wrinkle on cheeks of 4 different volunteers. Image was taken by Visio scope attached.

### Pores size

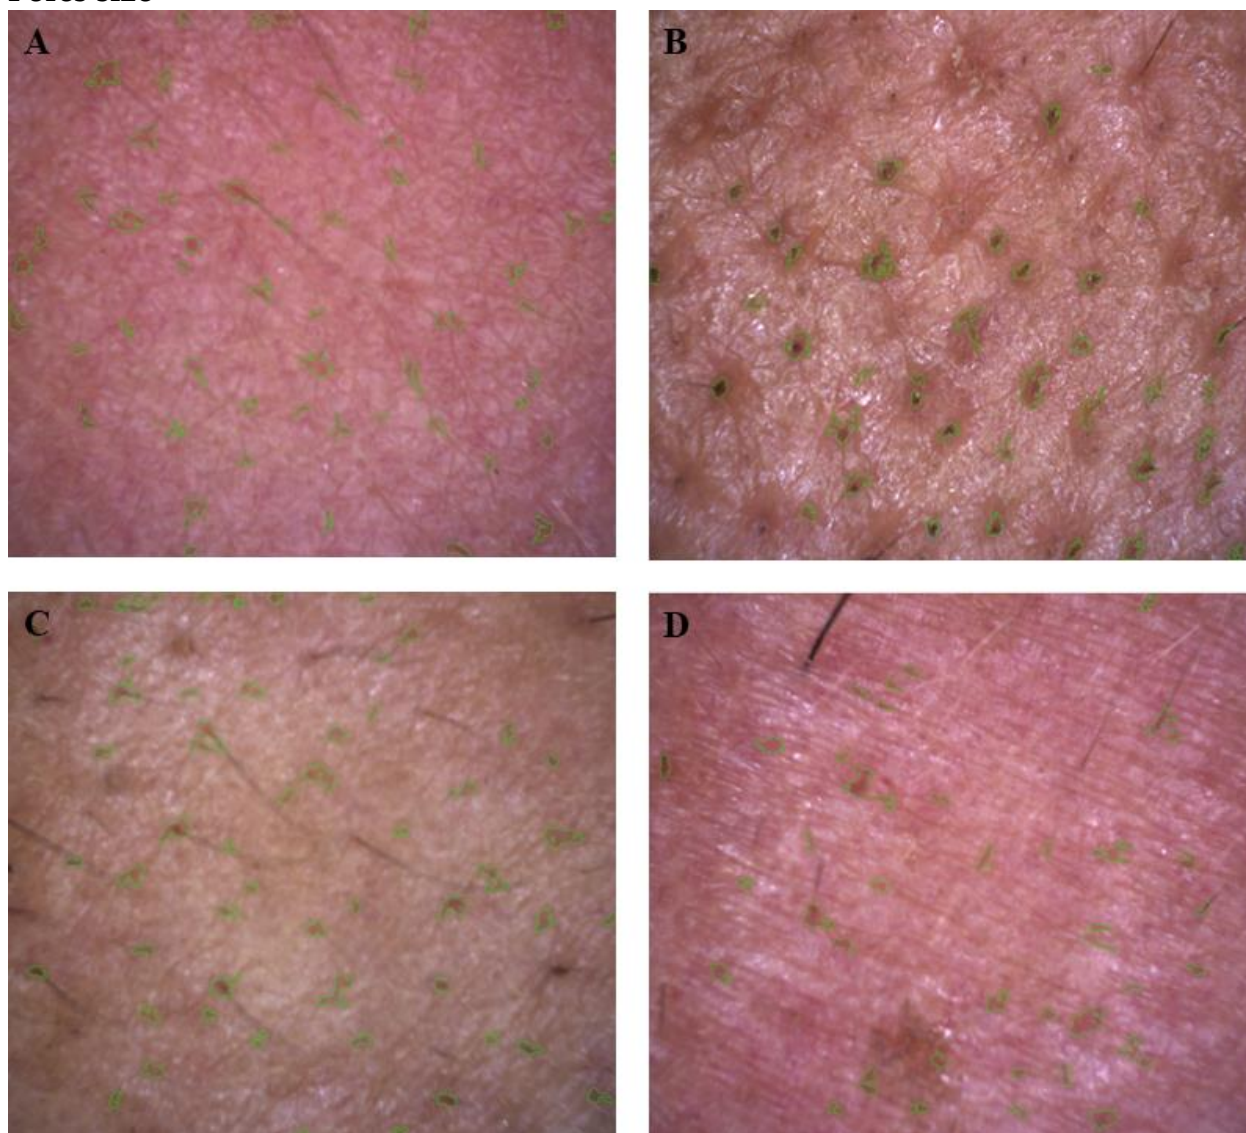

**Figure S3.** Pores size on of 4 different volunteers. Image was taken by Visio scope attached.

**Table S1.** Statistical analysis of formulations pH

| Dunnett's Multiple Comparisons Test | Mean Diff. | 95.00% CI of diff. | Significant? | Summary | Adjusted <i>p</i> Value |
|-------------------------------------|------------|--------------------|--------------|---------|-------------------------|
| 8°C                                 |            |                    |              |         |                         |
| 1M vs. 2M                           | -0.2100    | -0.5408 to 0.1208  | No           | ns      | 0.2521                  |
| 1M vs. 3M                           | -0.1600    | -0.4908 to 0.1708  | No           | ns      | 0.4288                  |
| 25°C                                |            |                    |              |         |                         |
| 1M vs. 2M                           | -0.3100    | -0.6408 to 0.02079 | No           | ns      | 0.0680                  |
| 1M vs. 3M                           | -0.1600    | -0.4908 to 0.1708  | No           | ns      | 0.4288                  |
| 40°C                                |            |                    |              |         |                         |
| 1M vs. 2M                           | -0.2400    | -0.5708 to 0.09079 | No           | ns      | 0.1756                  |
| 1M vs. 3M                           | -0.1500    | -0.4808 to 0.1808  | No           | ns      | 0.4712                  |
| 40°C + 75% RH                       |            |                    |              |         |                         |
| 1M vs. 2M                           | 0.2200     | -0.1108 to 0.5508  | No           | ns      | 0.2242                  |
| 1M vs. 3M                           | 0.1600     | -0.1708 to 0.4908  | No           | ns      | 0.4288                  |

| Dunnett's multiple comparisons test | Mean Diff. | 95.00% CI of diff. | Significant? | Summary | Adjusted P Value |
|-------------------------------------|------------|--------------------|--------------|---------|------------------|
| <b>1M</b>                           |            |                    |              |         |                  |
| 8°C vs. 25°C                        | 0.3100     | -0.04294 to 0.6629 | No           | ns      | 0.0937           |
| 8°C vs. 40°C                        | -0.05000   | -0.4029 to 0.3029  | No           | ns      | 0.9702           |
| 8°C vs. 40°C + 75% RH               | -0.5000    | -0.8529 to -0.1471 | Yes          | *       | 0.0045           |
| <b>2M</b>                           |            |                    |              |         |                  |
| 8°C vs. 25°C                        | 0.2100     | -0.1429 to 0.5629  | No           | ns      | 0.3307           |
| 8°C vs. 40°C                        | -0.08000   | -0.4329 to 0.2729  | No           | ns      | 0.8947           |
| 8°C vs. 40°C + 75% RH               | -0.07000   | -0.4229 to 0.2829  | No           | ns      | 0.9253           |
| <b>3M</b>                           |            |                    |              |         |                  |
| 8°C vs. 25°C                        | 0.3100     | -0.04294 to 0.6629 | No           | ns      | 0.0937           |
| 8°C vs. 40°C                        | -0.04000   | -0.3929 to 0.3129  | No           | ns      | 0.9841           |
| 8°C vs. 40°C + 75% RH               | -0.1800    | -0.5329 to 0.1729  | No           | ns      | 0.4498           |

**Table S2.** Cytotoxicity study on HaCaT cells

| Bonferroni's multiple comparisons test | Mean Diff. | 95.00% CI of diff. | Significant? | Summary | Adjusted P Value |
|----------------------------------------|------------|--------------------|--------------|---------|------------------|
| M-Ext - M-NLC                          |            |                    |              |         |                  |
| 0                                      | 0.000      | -6.258 to 6.258    | No           | ns      | >0.9999          |
| 1                                      | -0.5000    | -6.758 to 5.758    | No           | ns      | >0.9999          |
| 10                                     | -7.100     | -13.36 to -0.8419  | Yes          | *       | 0.0188           |
| 20                                     | -6.400     | -12.66 to -0.1419  | Yes          | *       | 0.0425           |
| 50                                     | -7.700     | -13.96 to -1.442   | Yes          | **      | 0.0092           |
| 100                                    | -10.60     | -16.86 to -4.342   | Yes          | ***     | 0.0002           |
| 250                                    | -9.900     | -16.16 to -3.642   | Yes          | ***     | 0.0006           |

**Table S3.** Cytotoxicity study on Fibroblast cells

| Bonferroni's multiple comparisons test | Mean Diff. | 95.00% CI of diff. | Significant? | Summary | Adjusted P Value |
|----------------------------------------|------------|--------------------|--------------|---------|------------------|
| M-Ext - M-NLC                          |            |                    |              |         |                  |
| 0                                      | 0.000      | -5.904 to 5.904    | No           | ns      | >0.9999          |
| 1                                      | -2.100     | -8.004 to 3.804    | No           | ns      | >0.9999          |
| 10                                     | -3.000     | -8.904 to 2.904    | No           | ns      | >0.9999          |
| 20                                     | -7.100     | -13.00 to -1.196   | Yes          | *       | 0.0113           |
| 50                                     | -9.700     | -15.60 to -3.796   | Yes          | ***     | 0.0004           |
| 100                                    | -9.000     | -14.90 to -3.096   | Yes          | ***     | 0.0009           |
| 250                                    | -9.700     | -15.60 to -3.796   | Yes          | ***     | 0.0004           |

**Table S4.** Statistical analysis of permeation studies

| Bonferroni's multiple comparisons test | Mean Diff. | 95.00% CI of diff.  | Significant? | Summary | Adjusted P Value |
|----------------------------------------|------------|---------------------|--------------|---------|------------------|
| <b>M-Ext - M-NLC</b>                   |            |                     |              |         |                  |
| 1                                      | -0.1000    | -0.1378 to -0.06220 | Yes          | ****    | <0.0001          |
| 2                                      | -0.1100    | -0.1478 to -0.07220 | Yes          | ****    | <0.0001          |
| 3                                      | -0.1500    | -0.1878 to -0.1122  | Yes          | ****    | <0.0001          |
| 6                                      | -0.1800    | -0.2178 to -0.1422  | Yes          | ****    | <0.0001          |

**Table S5.** Statistical analysis of Erythema

| Dunnett's multiple comparisons test | Mean Diff. | 95.00% CI of diff. | Significant? | Summary | Adjusted P Value |
|-------------------------------------|------------|--------------------|--------------|---------|------------------|
| <b>B-NLC-E</b>                      |            |                    |              |         |                  |
| M1 vs. M2                           | 0.8600     | 0.5186 to 1.201    | Yes          | ****    | <0.0001          |
| M1 vs. M3                           | 0.7300     | 0.3886 to 1.071    | Yes          | ****    | <0.0001          |
| <b>M-NLC-E</b>                      |            |                    |              |         |                  |
| M1 vs. M2                           | 5.300      | 4.959 to 5.641     | Yes          | ****    | <0.0001          |
| M1 vs. M3                           | 12.55      | 12.21 to 12.89     | Yes          | ****    | <0.0001          |

**Table S6.** Statistical analysis of Skin melanin level

| Dunnett's multiple comparisons test | Mean Diff. | 95.00% CI of diff. | Significant? | Summary | Adjusted P Value |
|-------------------------------------|------------|--------------------|--------------|---------|------------------|
| <b>B-NLC-E</b>                      |            |                    |              |         |                  |
| 1M vs. 2M                           | -0.2300    | -0.3282 to -0.1318 | Yes          | ****    | <0.0001          |
| 1M vs. 3M                           | -0.5600    | -0.6582 to -0.4618 | Yes          | ****    | <0.0001          |
| <b>M-NLC-E</b>                      |            |                    |              |         |                  |
| 1M vs. 2M                           | 1.900      | 1.802 to 1.998     | Yes          | ****    | <0.0001          |
| 1M vs. 3M                           | 11.64      | 11.54 to 11.74     | Yes          | ****    | <0.0001          |

**Table S7.** Statistical analysis of TEWL index

| Dunnett's multiple comparisons test | Mean Diff. | 95.00% CI of diff. | Significant? | Summary | Adjusted P Value |
|-------------------------------------|------------|--------------------|--------------|---------|------------------|
| B-NLC-E                             |            |                    |              |         |                  |
| 1M vs. 2M                           | 0.3800     | 0.1827 to 0.5773   | Yes          | ***     | 0.0001           |
| 1M vs. 3M                           | 0.5300     | 0.3327 to 0.7273   | Yes          | ****    | <0.0001          |
| M-NLC-E                             |            |                    |              |         |                  |
| 1M vs. 2M                           | 1.210      | 1.013 to 1.407     | Yes          | ****    | <0.0001          |
| 1M vs. 3M                           | 12.92      | 12.72 to 13.12     | Yes          | ****    | <0.0001          |

**Table S8.** Statistical analysis of Moisture level

| Dunnett's multiple comparisons test | Mean Diff. | 95.00% CI of diff. | Significant? | Summary | Adjusted P Value |
|-------------------------------------|------------|--------------------|--------------|---------|------------------|
| B-NLC-E                             |            |                    |              |         |                  |
| 1M vs. 2M                           | -0.6200    | -0.8343 to -0.4057 | Yes          | ****    | <0.0001          |
| 1M vs. 3M                           | -1.730     | -1.944 to -1.516   | Yes          | ****    | <0.0001          |
| M-NLC-E                             |            |                    |              |         |                  |
| 1M vs. 2M                           | -1.290     | -1.504 to -1.076   | Yes          | ****    | <0.0001          |
| 1M vs. 3M                           | -4.650     | -4.864 to -4.436   | Yes          | ****    | <0.0001          |

**Table S9.** Statistical analysis of Sebum level

| Dunnett's multiple comparisons test | Mean Diff. | 95.00% CI of diff. | Significant? | Summary | Adjusted P Value |
|-------------------------------------|------------|--------------------|--------------|---------|------------------|
| B-NLC-E                             |            |                    |              |         |                  |
| M1 vs. M2                           | 2.460      | 2.328 to 2.592     | Yes          | ****    | <0.0001          |
| M1 vs. M3                           | 0.7900     | 0.6579 to 0.9221   | Yes          | ****    | <0.0001          |
| M-NLC-E                             |            |                    |              |         |                  |
| M1 vs. M2                           | 3.660      | 3.528 to 3.792     | Yes          | ****    | <0.0001          |
| M1 vs. M3                           | 18.29      | 18.16 to 18.42     | Yes          | ****    | <0.0001          |

**Table S10.** Statistical analysis of elasticity of skin

| Dunnett's multiple comparisons test | Mean Diff. | 95.00% CI of diff. | Significant? | Summary | Adjusted P Value |
|-------------------------------------|------------|--------------------|--------------|---------|------------------|
| B-NLC-E                             |            |                    |              |         |                  |
| 1M vs. 2M                           | 1.720      | 1.531 to 1.909     | Yes          | ****    | <0.0001          |
| 1M vs. 3M                           | 0.2300     | 0.04137 to 0.4186  | Yes          | *       | 0.0144           |
| M-NLC-E                             |            |                    |              |         |                  |
| 1M vs. 2M                           | -3.150     | -3.339 to -2.961   | Yes          | ****    | <0.0001          |
| 1M vs. 3M                           | -13.12     | -13.31 to -12.93   | Yes          | ****    | <0.0001          |

**Table S11.** Statistical analysis of Wrinkles

| Dunnett's multiple comparisons test | Mean Diff. | 95.00% CI of diff. | Significant? | Summary | Adjusted P Value |
|-------------------------------------|------------|--------------------|--------------|---------|------------------|
| B-NLC-E                             |            |                    |              |         |                  |
| 1M vs. 2M                           | -3.600     | -3.756 to -3.444   | Yes          | ****    | <0.0001          |
| 1M vs. 3M                           | -9.650     | -9.806 to -9.494   | Yes          | ****    | <0.0001          |
| M-NLC-E                             |            |                    |              |         |                  |
| 1M vs. 2M                           | 0.5900     | 0.4343 to 0.7457   | Yes          | ****    | <0.0001          |
| 1M vs. 3M                           | 10.61      | 10.45 to 10.77     | Yes          | ****    | <0.0001          |

**Table S12.** Statistical analysis of pH of the skin

| Dunnett's multiple comparisons test | Mean Diff. | 95.00% CI of diff.  | Significant? | Summary | Adjusted P Value |
|-------------------------------------|------------|---------------------|--------------|---------|------------------|
| B-NLC-E                             |            |                     |              |         |                  |
| 1M vs. 2M                           | 0.1200     | 0.08500 to 0.1550   | Yes          | ****    | <0.0001          |
| 1M vs. 3M                           | 0.2500     | 0.2150 to 0.2850    | Yes          | ****    | <0.0001          |
| M-NLC-E                             |            |                     |              |         |                  |
| 1M vs. 2M                           | 0.000      | -0.03500 to 0.03500 | No           | ns      | >0.9999          |
| 1M vs. 3M                           | 0.5400     | 0.5050 to 0.5750    | Yes          | ****    | <0.0001          |

**Table S13.** Statistical analysis of Pores sizes

| Dunnett's multiple comparisons test | Mean Diff. | 95.00% CI of diff. | Significant? | Summary | Adjusted P Value |
|-------------------------------------|------------|--------------------|--------------|---------|------------------|
| B-NLC-E                             |            |                    |              |         |                  |
| 1M vs. 2M                           | -3.600     | -3.897 to -3.303   | Yes          | ****    | <0.0001          |
| 1M vs. 3M                           | -9.650     | -9.947 to -9.353   | Yes          | ****    | <0.0001          |
| M-NLC-E                             |            |                    |              |         |                  |
| 1M vs. 2M                           | 0.5900     | 0.2927 to 0.8873   | Yes          | ****    | <0.0001          |
| 1M vs. 3M                           | 10.61      | 10.31 to 10.91     | Yes          | ****    | <0.0001          |

**Table S14.** Comparison of measuring options for B-NLC-E and M-NLC-E

| Measuring options |             | Mean values |       |       |       |
|-------------------|-------------|-------------|-------|-------|-------|
|                   | Formulation | 0 hr        | 1 M   | 2 M   | 3 M   |
| Skin melanin      | B-NLC-E     | 24.33       | 24.30 | 24.38 | 24.09 |
|                   | M-NLC-E     | 24.39       | 21.61 | 21.02 | 18.73 |
| Skin erythema     | B-NLC-E     | 52.69       | 52.35 | 51.76 | 51.92 |
|                   | M-NLC-E     | 56.82       | 50.57 | 47.25 | 43.00 |
| Moisture          | B-NLC-E     | 41.48       | 41.41 | 41.29 | 41.58 |
|                   | M-NLC-E     | 45.82       | 53.64 | 53.95 | 55.95 |
| TEWL              | B-NLC-E     | 14.09       | 14.09 | 14.00 | 14.00 |
|                   | M-NLC-E     | 14.09       | 12.64 | 12.45 | 10.82 |
| Skin pH           | B-NLC-E     | 4.79        | 4.78  | 4.77  | 4.76  |
|                   | M-NLC-E     | 4.75        | 4.78  | 4.78  | 4.75  |
| Skin Elasticity   | B-NLC-E     | 67.64       | 67.73 | 66.36 | 67.45 |
|                   | M-NLC-E     | 67.09       | 69.27 | 71.45 | 78.09 |
| Skin Sebum        | B-NLC-E     | 15.91       | 15.36 | 15.00 | 15.18 |
|                   | M-NLC-E     | 12.63       | 10.63 | 10.18 | 8.36  |

## **Written consent sample**

### **COMSATS UNIVERSITY ISLAMABAD, ABBOTTABAD CAMPUS CONSENT TO PARTICIPATE IN RESEARCH STUDY Short Form Written Consent (used with oral consent form)**

**STUDY TITLE:** “Complete Skin Investigation of *Mangifera indica* L. Extract Loaded Nano-lipid Carriers Green Topical Formulation” on skin of volunteers in Population of Abbottabad.

**Principle Investigator:** Dr. Atif Ali

**Investigator:** Zaheer Ullah Khan

#### **WRTTIEN CONCENT**

I confirm that the researcher has explained the elements of informed consent to the participant. The subject knows that their participation is voluntary, and that they do not need to answer all questions. The purpose of the research as well as the risks and benefits have been explained. The procedures as well as the time commitment have been outlined. The participant understands issues of confidentiality.

**Participant name** \_\_\_\_\_

**Participant signature**\_\_\_\_\_
